# Supplementary material
Source: PubMed Central journal article supplement (PMC2658557)
Supplement: embor20096-s1.pdf [file embor20096-s1.pdf]

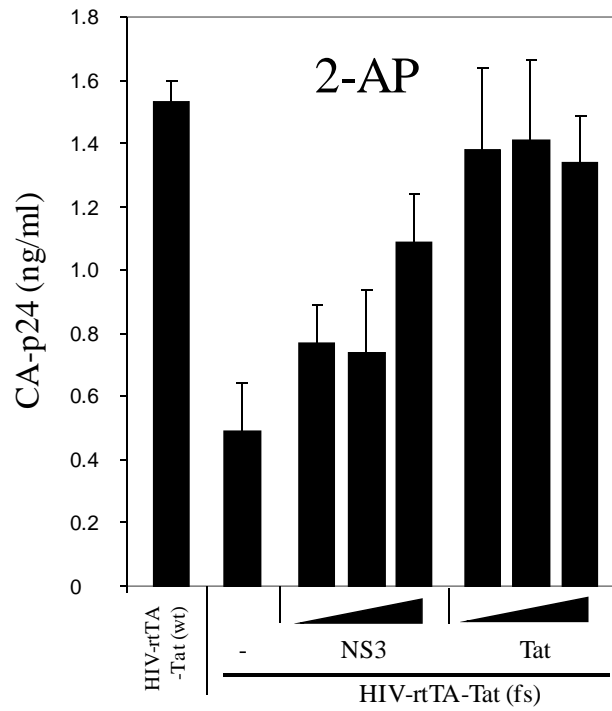

**Figure S1: Effect of 2-AP on NS3 trans-complementation.**

HEK293T cells were co-transfected with HIV-rtTA-Tat(wt), HIV-rtTA-Tat(fs) and HIV-rtTA-Tat(fs) in combination with increasing amounts (300, 600 and 900 ng) of NS3 or Tat expression plasmids. The PKR inhibitor 2-AP (final concentration of 2,5 mM) was added 4 hours post transfection. HIV-1 production was determined two days post transfection by detecting CA-p24 in the supernatant using ELISA. The standard error bars represent the mean of three independent experiments.

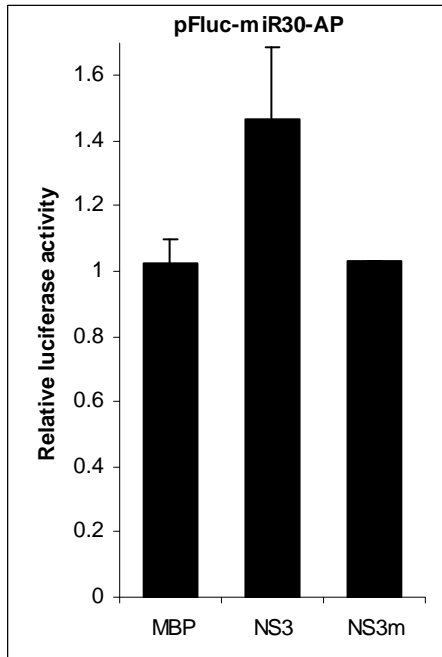

**Figure S2: NS3 inhibits activity of endogenous antisense miRNA30.**

HEK293T cells were co-transfected with expression vectors encoding pCMV-luc-miR30-AP, in combination with MBP, MBP-NS3 or MBP-NS3m (600 ng). Luciferase expression was measured 2 days post transfection and relative luciferase expression (firefly/renilla) was determined. The average of at least three independent experiments with standard error is indicated and the luciferase level measured with NS3m was set at 1.0.
